# Supplementary material for: Zinc ion-doped carbon dots with strong yellow photoluminescence
Source: Royal Society of Chemistry journal article supplement (doi:10.1039/c5ra27808b), 2016-01-01
Supplement: c5ra27808b1.pdf [file c5ra27808b1.pdf]

## Supporting Information

### Metal ions doped carbon dots with strongly yellow photoluminescence

Jian Cheng, Cai-Feng Wang, Yan Zhang, ShengYang Yang, Su Chen\*

#### The quantum yield calculation

The quantum yield measurements were performed with Rhodamine 6G in ethanol (literature quantum yield 0.95 at 488 nm) as the standard. The relative quantum yield values were calculated corresponding to the following equation:

$$\Phi_u = \Phi_s (Y_u/Y_s)(A_s/A_u)(n_u^2/n_s^2)$$

$\Phi$  is quantum yield;  $Y$  is the measured integrated fluorescence emission intensity;  $A$  is the optical density measured at the excitation wavelength;  $n$  is the refractive index. The subscript “s” refers to the standard. The subscript “u” refers to the unknown quantum yield of  $\text{Zn}^{2+}$ -doped CDs. The refractive indexes of water and ethanol were 1.333 and 1.362, respectively (the CDs aqueous solutions were assumed as water). In order to minimize re-absorption effects, absorbance were kept under 0.05.

**Table 1** Quantum yield measurements of  $\text{Zn}^{2+}$ -doped CDs.

|              | $\Phi_s$ | $Y$  | $A$   | $n$   | $\Phi_{\text{CD}}$ |
|--------------|----------|------|-------|-------|--------------------|
| Rhodamine 6G | 0.94     | 3106 | 0.042 | 1.362 | 51.2%              |

#### Fluorescence lifetime calculation

The fluorescence lifetime ( $\tau$ ) of CDs was assessed by time-resolved photoluminescence measurements. The decay trace for CDs was fitted using biexponential functions  $Y(t)$  based on non-linear least squares analysis in Equation (1)

$$Y(t) = \alpha_1 \exp(-t/\tau_1) + \alpha_2 \exp(-t/\tau_2) \quad (1)$$

Where  $\alpha_1$  and  $\alpha_2$  are the fractional contributions of timeresolved decay lifetime of  $\tau_1$  and  $\tau_2$ . According to Equation (2),

$$\bar{\tau} = \frac{\alpha_1 \tau_1^2 + \alpha_2 \tau_2^2}{\alpha_1 \tau_1 + \alpha_2 \tau_2} \quad (2)$$

we calculated the average lifetime  $\bar{\tau}$  of  $\text{Zn}^{2+}$ -doped CDs as  $6.8 \pm 0.05$  ns. The chi-squared ( $\chi^2$ ) values of the fittings were maintained below.

**Table 2** Fluorescence lifetimes of  $\text{Zn}^{2+}$ -doped CDs and Without  $\text{Zn}^{2+}$ -doped CDs.

|                                                      | $\alpha_1(\%)$ | $\tau_1(\text{ns})$ | $\alpha_2(\%)$ | $\tau_2(\text{ns})$ | $\chi^2$ |
|------------------------------------------------------|----------------|---------------------|----------------|---------------------|----------|
| <b><math>\text{Zn}^{2+}</math>-doped CDs</b>         | 78.7           | 2.6                 | 21.3           | 10.6                | 0.99     |
| <b>Without <math>\text{Zn}^{2+}</math>-doped CDs</b> | 63.8           | 4.5                 | 36.2           | 6.7                 | 1.05     |

## Figures:

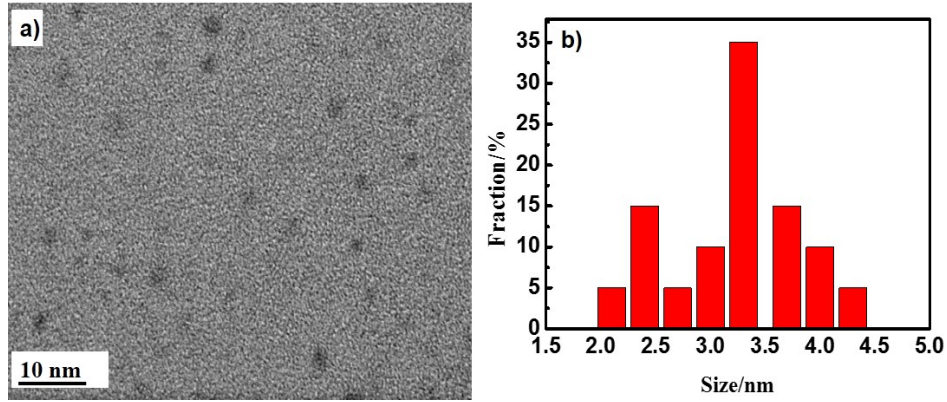

**Fig. S1** a) TEM image of  $\text{Zn}^{2+}$ -doped CDs. b) Size histogram of  $\text{Zn}^{2+}$ -doped CDs derived from TEM image in Fig. S1a.

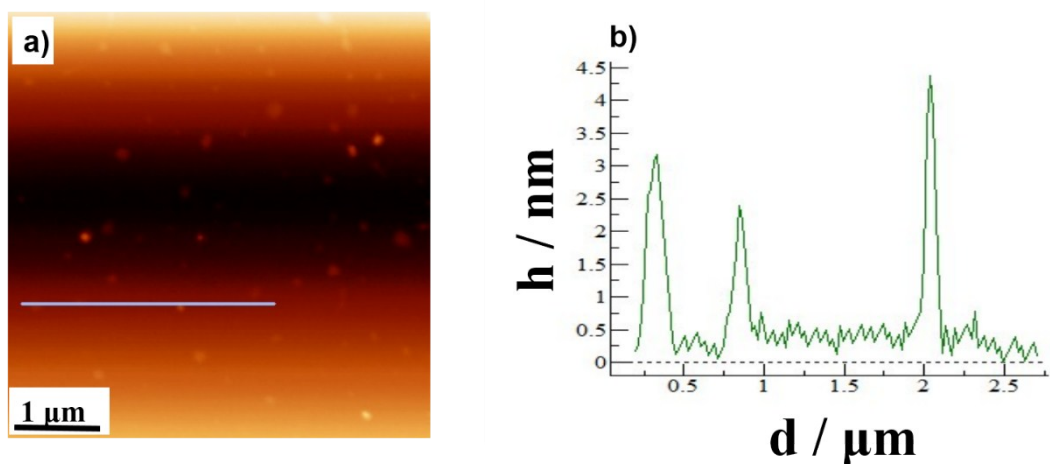

**Fig. S2** a) AFM topography image of  $\text{Zn}^{2+}$ -doped CDs on mica substrate. b) With the height profile analysis along the line in the image.

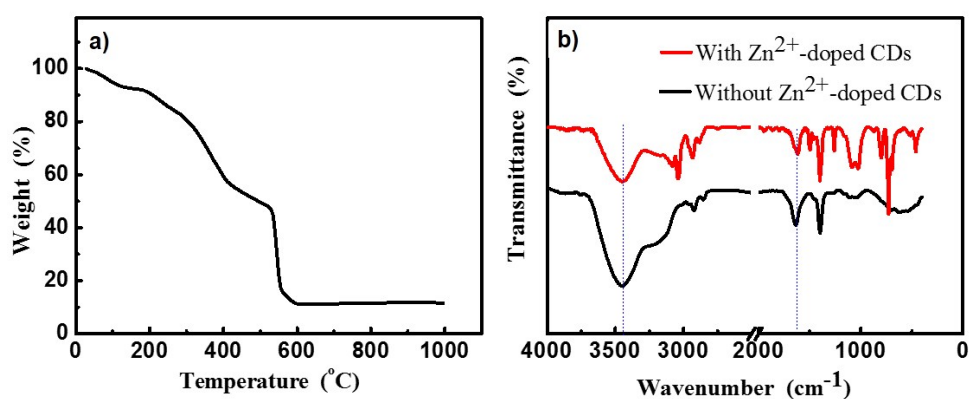

**Fig. S3** a) TGA image of the  $\text{Zn}^{2+}$ -doped CDs ( $10^{\circ}\text{C min}^{-1}$  in air flow). b) FTIR spectra of the  $\text{Zn}^{2+}$ -doped CDs (red) and without  $\text{Zn}^{2+}$ -doped CDs (black).

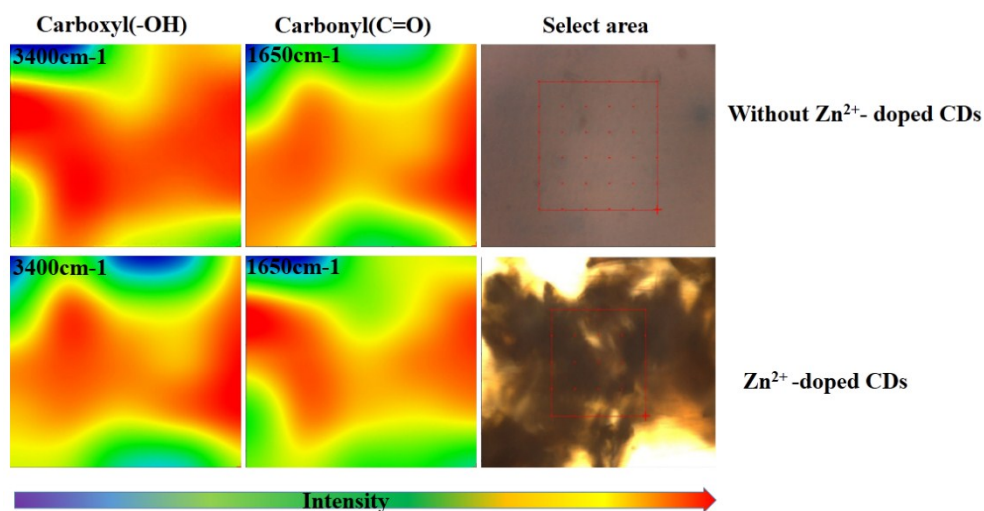

**Fig. S4** MFTIR spectra of carboxyl ( $3400 \text{ cm}^{-1}$ ) and carbonyl ( $1650 \text{ cm}^{-1}$ ) groups of without  $\text{Zn}^{2+}$ -doped and CDs  $\text{Zn}^{2+}$ -doped CDs.

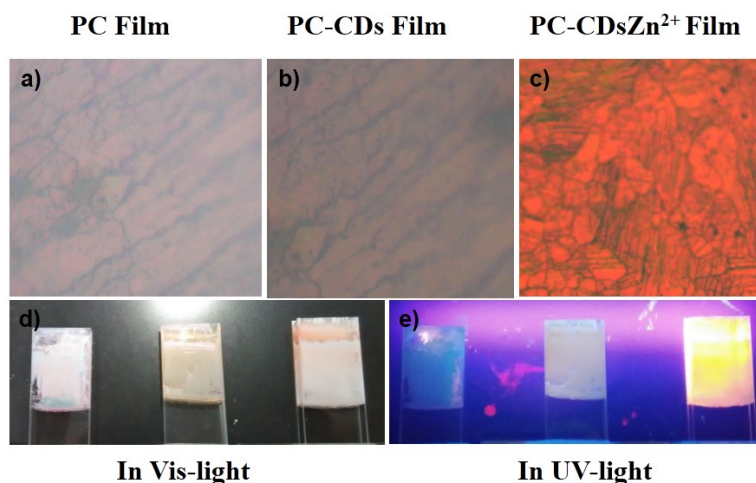

**Fig. S5** a) Structural color of a) PC film, b) PC-CDs film and c) PC-CDs<sub>Zn<sup>2+</sup></sub> film by the Metallurgical Microscopy., Images of PC film, PC-CDs film, PC-CDs<sub>Zn<sup>2+</sup></sub> film under Vis-light d) and UV-light e), respectively.

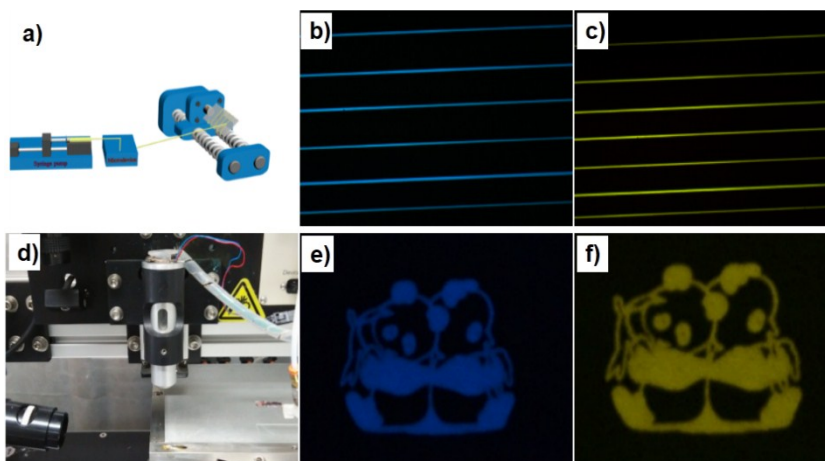

**Fig. S6** a) Scheme diagram of the microfluidic-spinning device. b), c) Fluorescence microscopy images of CDs-PVP fluorescent microfibers under UV light (Without Zn<sup>2+</sup>-doped CDs (b) and Zn<sup>2+</sup>-doped CDs (c)). d) Nano inkjet printer. Fluorescent patterns with CDs (Without Zn<sup>2+</sup>-doped CDs (e) and Zn<sup>2+</sup>-doped CDs (f))
